## CORRECTION

# Correction: Foxn4 promotes gene expression required for the formation of multiple motile cilia

**Evan P. Campbell, Ian K. Quigley and Chris Kintner**

There was an error published in Development **143**, 4654-4664.

The name of the first author was misspelt. The correct name appears above and has been corrected in the published article.

The authors apologise to readers for this mistake.
